# Supplementary material for: Bismuth tungstate nanocomposites for simultaneous detection of hydroquinone and resorcinol
Source: Royal Society of Chemistry journal article supplement (doi:10.1039/d3ma00533j), 2024-01-01
Supplement: d3ma00533j1.pdf [file d3ma00533j1.pdf]

## Supporting Information

### Bismuth Tungstate Nanocomposites for Simultaneous Detection of Hydroquinone and Resorcinol

Thatchanamoorthy Thenrajan,<sup>1</sup> Madasamy Madhumalar,<sup>1</sup> Sangeetha Kumaravel,<sup>2,4</sup> Rajendran  
Rajaram,<sup>3</sup> Subrata Kundu,<sup>4,\*</sup> Jeyaraj Wilson<sup>1,\*</sup>

<sup>1</sup>Polymer electronics lab, Department of Bioelectronics and Biosensors, Alagappa University,  
Karaikudi - 630 003, Tamil Nadu, India.

<sup>2</sup>School of Advanced Sciences, Department of Chemistry, Kalasalingam Academy of Research  
and Education, Krishnankoil - 626 126, Tamil Nadu, India.

<sup>3</sup>Department of Chemistry, Madanapalle Institute of technology and Science, Angallu (V),  
Madanapalle, Andhrapradesh – 517325, India.

<sup>4</sup>Electrochemical Process Engineering (EPE) Division, CSIR-Central Electrochemical  
Research Institute (CECRI), Karaikudi, 630003, Tamil Nadu.

Corresponding author E-mail ID: [skundu@cecri.res.in](mailto:skundu@cecri.res.in) (S. K) and [wilson.j2008@yahoo.com](mailto:wilson.j2008@yahoo.com)(J.  
W)

This file contains Total 5 pages.

No of Figures: 2 (Figure S1 and S2)

No of tables: 1 (Table S1)

## 23 **Instrumentation**

24 Using a Bruker AXS D8 advanced diffractometer with Cu K $\alpha$  radiation ( $\lambda = 1.5406 \text{ \AA}$ ),  
25 X-ray diffraction studies was taken at 5° min in the 2 $\theta$  range 5°– 90°. Utilizing the  
26 ThermoNicolect 380's IR method, functional groupings were determined. Raman spectroscopy  
27 type STR 500 mm focal length laser Raman spectrometer (SEKI Japan) was used to measure  
28 the various vibration modes. The morphological studies and the HAADF color mapping of  
29 Bi<sub>2</sub>WO<sub>6</sub> were carried in HR-TEM, (Tecnai<sup>TM</sup> G2TF20) working at an accelerating voltage of  
30 200 kV and the Energy Dispersive X-ray Spectroscopy (EDS) analysis was done with separate  
31 EDS detector in the same instrument. The FE-SEM was performed in SUPRA 55VP, Gemini  
32 Column with 1.2 nm gold particle separation on a carbon substrate. With air lock system.  
33 Photoluminescence study was observed using Varian Cary Eclipse Photo Luminescence  
34 spectrometer. The electrochemical measurements like Cyclic Voltammetry (CV),  
35 Electrochemical Impedance Spectroscopy (EIS), Square Wave Voltammetry (SWV) were  
36 studied by involving a CHI 6005D electrochemical workstation (CH instruments, USA).

## 37 **Materials and Reagents**

38 All the chemicals used in the synthesis of Bi<sub>2</sub>WO<sub>6</sub> were procured from Sigma Aldrich.  
39 Sodium tungstate (99%), bismuth nitrate pentahydrate (98%), sodium dihydrogen phosphate,  
40 disodium hydrogen phosphate, hydrochloric acid (HCl, 30%), hydroquinone (HQ), resorcinol  
41 (RS), catechol (CC), ferric chloride (Fe), potassium chloride (K), ascorbic acid (AA) and  
42 magnesium (Mg) were purchased from Sigma-Aldrich Co Ltd in Bangalore (India) of an  
43 analytical grade and used without further purification. Deionized (DI) water was used as a  
44 solvent throughout the experiment and all the measurements were carried out in Phosphate  
45 Buffer Solution (PBS) as a supporting electrolyte. In order to make PBS, sodium dihydrogen  
46 phosphate and disodium hydrogen phosphate were mixed together and the pH was  
47 subsequently altered with HCl and NaOH. Three electrode systems, namely a glassy carbon

48 electrode (GCE) as the working electrode, silver/silver chloride (Ag/AgCl) as the reference  
49 electrode, and platinum (Pt) wire as the counter electrode, were used to carry out the  
50 electrochemical portion.

51

52

53

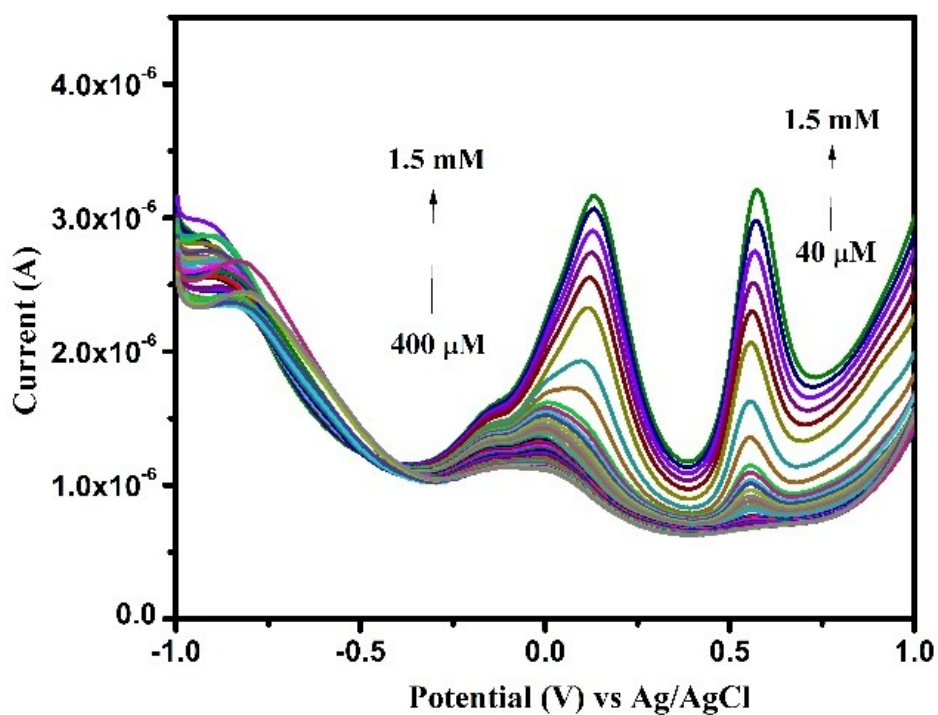

54

55 **Figure S1.** SWV of the bare GCE for simultaneous detection of HQ and RS.

56

57

58

59

60

61

62

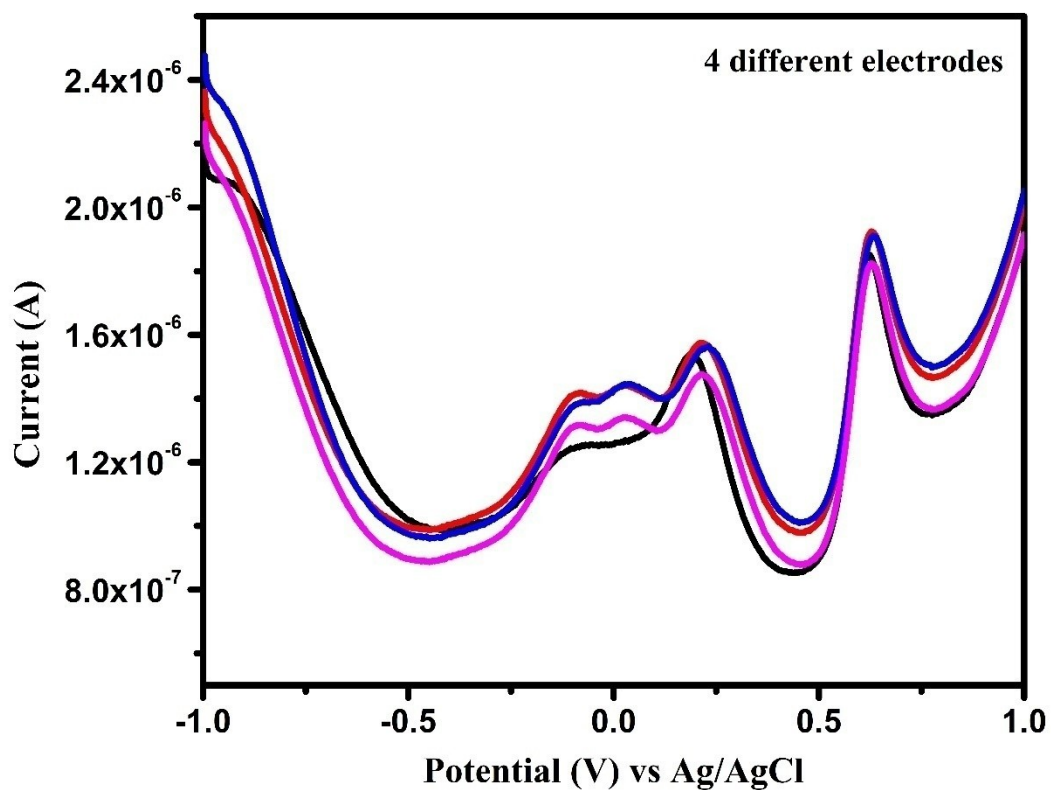

63

64

*Figure S2. Reproducibility study with for different electrodes.*

65

66

67

68

69

70

71

**Table S1: Comparison study with previous works.**

| S. No | Method                 | Electrode                                   | Linear range( $\mu\text{M}$ ) |           | Limit of detection ( $\mu\text{M}$ ) |      | Reference        |
|-------|------------------------|---------------------------------------------|-------------------------------|-----------|--------------------------------------|------|------------------|
|       |                        |                                             | HQ                            | RS        | HQ                                   | RS   |                  |
| 1.    | Electrochemical sensor | ZIF-8/CNF                                   | 2-400                         |           | 0.06                                 | 0.32 | 1                |
| 2.    |                        | CoFe <sub>2</sub> Se <sub>4</sub> /PC F/GCE | 0.5-200                       | 5-350     | 0.13                                 | 1.36 | 2                |
| 3.    |                        | HMCCSs/GCE                                  | 0.3~1000                      | 3~600     | 0.12                                 | 1.1  | 3                |
| 4.    |                        | N-NiCSs/GCE                                 | 0.005-100                     | 5-500     | 0.00152                              | 0.24 | 4                |
| 5.    |                        | P-rGO-GCE                                   | 5–90                          | 5–90      | 0.08                                 | 2.62 | 5                |
| 6.    |                        | CA-GCE                                      | 1–300                         | 5–200     | 0.46                                 | 0.47 | 6                |
| 7.    |                        | Bi <sub>2</sub> WO <sub>6</sub>             | 200 – 5000                    | 20 – 5000 | 57                                   | 4.3  | <b>This work</b> |

72

### 73 References

74 1 S. Yang, M. Yang, X. Yao, H. Fa, Y. Wang and C. Hou, *Sensors Actuators, B Chem.*,  
75 2020, **320**, 128294.

76 2 D. Yin, J. Liu, X. Bo and L. Guo, *Anal. Chim. Acta*, 2020, **1093**, 35–42.

77 3 H. Ren, Y. Zhang, L. Liu, Y. Li, D. Wang, R. Zhang, W. Zhang, Y. Li and B. C. Ye,  
78 *Microchim. Acta*, 2019, 186.

79 4 Y. Feng, Y. Li, Y. Tong, C. Cui, X. Li and B. C. Ye, *Anal. Chim. Acta*, 2021, **1176**,  
80 338768.

81 5 H. Zhang, X. Bo and L. Guo, *Sensors Actuators, B Chem.*, 2015, **220**, 919–926.

82 6 H. Y. LIU, L. L. ZHU, Z. H. HUANG, Y. B. QIU, H. X. XU, J. J. WEN, W. W. XIONG,  
83 L. H. LI and C. C. GU, *Chinese J. Anal. Chem.*, 2019, **47**, e19113–e19120.
